## RESEARCH ARTICLE

# Limits to sustained energy intake. XX. Body temperatures and physical activity of female mice during lactation

Y. Gamo<sup>1</sup>, C. Troup<sup>1</sup>, S. E. Mitchell<sup>1</sup>, C. Hambly<sup>1</sup>, L. M. Vaanholt<sup>1</sup> and J. R. Speakman<sup>1,2,\*</sup>

<sup>1</sup>Institute of Biological and Environmental Sciences, University of Aberdeen, Aberdeen, AB24 2TZ, UK and <sup>2</sup>Institute of Genetics and Developmental Biology, State Key Laboratory of Molecular Developmental Biology, Chinese Academy of Sciences, Beichen Xi Lu, Chaoyang, Beijing, People's Republic of China

\*Author for correspondence (J.Speakman@abdn.ac.uk)

### SUMMARY

Lactating animals consume greater amounts of food than non-reproductive animals, but energy intake appears to be limited in late lactation. The heat dissipation limit theory suggests that the food intake of lactating mice is limited by the capacity of the mother to dissipate heat. Lactating mice should therefore have high body temperatures ( $T_b$ ), and changes in energy intake during lactation should be reflected by variation in  $T_b$ . To investigate these predictions, 26 mice (*Mus musculus*) were monitored daily throughout lactation for food intake, body mass, litter size and litter mass. After weaning, 21 days postpartum, maternal food intake and body mass were monitored for another 10 days. Maternal activity and  $T_b$  were recorded every minute for 23 h a day using implanted transmitters (vital view). Energy intake increased to a plateau in late lactation (days 13–17). Daily gain in pup mass declined during this same period, suggesting a limit on maternal energy intake. Litter size and litter mass were positively related to maternal energy intake and body mass. Activity levels were constantly low, and mice with the largest increase in energy intake at peak lactation had the lowest activity.  $T_b$  rose sharply after parturition and the circadian rhythm became compressed within a small range.  $T_b$  during the light period increased considerably (1.1°C higher than in baseline), and lactating mice faced chronic hyperthermia, despite their activity levels in lactation being approximately halved. Average  $T_b$  increased in relation to energy intake as lactation progressed, but there was no relationship between litter size or litter mass and the mean  $T_b$  at peak lactation. These data are consistent with the heat dissipation limit theory, which suggests performance in late lactation is constrained by the ability to dissipate body heat.

Supplementary material available online at <http://jeb.biologists.org/cgi/content/full/216/19/3751/DC1>

Key words: reproduction, body temperature, physical activity, energy intake.

Received 2 May 2013; Accepted 17 June 2013

### INTRODUCTION

Lactation is one of the most energy demanding periods in the life cycle of a female mammal (Butte and King, 2005; Speakman, 2008; Wade and Schneider, 1992). Typical energy intake during lactation may be two to four times greater than that of non-reproductive animals (Speakman and McQueenie, 1996; Studier, 1979). There is a large body of work, mainly conducted in small rodents, that suggests that the intake of energy at peak lactation is limited. Energy intake at peak lactation reaches an asymptote (Johnson et al., 2001a; Johnson et al., 2011b; Król et al., 2003; Król et al., 2007; Zhao and Cao, 2009), and several studies have shown that when female mice are presented with artificially enlarged litters they do not elevate their intake to compensate for the increased demands of the offspring (Hammond and Diamond, 1992; Johnson et al., 2001b; Laurien-Kehnen and Trillmich, 2003). This failure to modulate intake in relation to litter size results in offspring that wean at a much reduced body mass compared with those from small litters (natural or artificially manipulated) (Duah et al., 2013; Hammond and Diamond, 1992; Johnson et al., 2001b; Zhao et al., 2013b). Indeed, if litters are made very large, the female may be unable to deliver sufficient resources to ensure their survival (Hammond and Diamond, 1992). Other experimental manipulations have also suggested that the intake of the female at peak lactation is limited.

If females become pregnant while already lactating (Johnson et al., 2001b), are forced to run for their food (Perrigo, 1987; Schubert et al., 2009; Zhao et al., 2013a) or are infected with parasites (Kristan and Hammond, 2000), they do not elevate their total intake to cope with these additional demands, leading to trade-offs in the amount of milk they deliver to their offspring. Mice did elevate the mass of food ingested if they were presented with a low quality food, which had been diluted with cellulose (Speakman et al., 2001), but in this case the net energy intake remained at around the same level as that observed when feeding on more digestible food.

Several hypotheses have been advanced to explain the limitations in food intake at peak lactation. These have included the 'central limitation hypothesis', which suggests that energy budgets are limited by the capacity of the alimentary tract to absorb and process food; the 'metabolic theory of ecology', which suggests that metabolic rates are limited by the geometry of the fractal supply network distributing absorbed resources to their sites of use; the 'peripheral limitation hypothesis', suggesting that total demand is a sum of the demands of individual tissues in the periphery, each working under unique physiological constraints; and the 'heat dissipation limitation (HDL) theory', which suggests that the constraining factor is the capacity to dissipate body heat and risk of hyperthermia (reviewed in Speakman and Król, 2005; Speakman

and Król, 2011; Piersma and van Gils, 2010). Varying the ambient temperature experienced by animals during lactation has repeatedly shown that female animals modulate their intake at peak lactation in relation to the prevailing ambient temperature (Hammond et al., 1994; Jansen and Binard, 1991; Johnson and Speakman, 2001; Hammond and Kristan, 2000; Leon and Woodside, 1983; Morag et al., 1969; Rogowitz, 1998; Wu et al., 2009; Zhang and Wang, 2007). Such data are incompatible with, and hence disprove, the central limitation hypothesis and the metabolic theory of ecology, but are consistent with the two other ideas – the peripheral limitation hypothesis and the HDL theory.

Support for the peripheral limitation hypothesis and the HDL theory has been mixed. Hammond et al. (Hammond et al., 1996) surgically removed some of the mammary tissue of Swiss Webster mice. The rationale for this experiment was that if the mammary tissue sets the limits on intake and it is normally working at capacity, it would not be possible for the remaining tissue to compensate for the tissue that had been surgically removed. In line with the peripheral limitation hypothesis, the tissue remaining after surgery did not elevate its milk production capacity. The peripheral limitation hypothesis also predicts that under different temperature conditions mice would generate constant milk supplies for their offspring because the tissues would always be working at capacity. Supporting this prediction, in lactating cotton rats (*Sigmodon hispidus*), food intake was elevated in the cold, but milk production was not (Rogowitz, 1998). However, in MF1 mice, milk production varied in relation to ambient temperature, being higher in the cold and lower when it was hot, suggesting that the mammary gland did not limit the energy budget (Johnson and Speakman, 2001; Król et al., 2003). This result was therefore more consistent with the HDL theory. This effect was also later demonstrated in Brandt's voles (*Lasiopodomys brandtii*) (Wu et al., 2009) and common voles (*Microtus arvalis*) (Simons et al., 2011). Furthermore, when lactating MF1 mice were shaved to increase their capacity to dissipate heat, they increased food intake and milk production and they weaned larger pups than unshaved mice (Król et al., 2007). In contrast, shaving Swiss mice (Zhao and Cao, 2009; Zhao et al., 2010) and hamsters (*Phodopus sungorus*) (Paul et al., 2010) increased food intake, demonstrating an increase in heat loss, but had no significant effect on milk production or pup growth. In common voles, shaving resulted in significantly increased pup growth (Simons et al., 2011), and the effects on food intake and milk production were in the anticipated direction from the HDL theory, but the latter effects were not statistically significant.

Although support for the HDL theory is not universal, this theory is consistent with several other observations of females at peak lactation. For example, there are sporadic reports that body temperature ( $T_b$ ) was elevated during lactation in various species, including Norway rats (*Rattus norvegicus*) (Leon et al., 1978), Mongolian gerbils (*Meriones unguiculatus*) (Weinand and Gattermann, 1995), Sprague-Dawley rats (*Rattus norvegicus*) (Eliason and Fewell, 1997) and dwarf hamsters (*Phodopus campbelli* and *P. sungorus*) (Scribner and Wynne-Edwards, 1994). In addition, lactating rodents reduce wheel-running activity and spontaneous locomotor activity (Scribner and Wynne-Edwards, 1994; Speakman et al., 2001; Weinandy and Gattermann, 1995; Zhao et al., 2013a), and thermogenesis in brown adipose tissue (BAT) is also suppressed (Król et al., 2011; Trayhurn, 1983; Trayhurn and Jennings, 1987). During physical activity, heat production is elevated (Refinetti, 2003; Weinert and Waterhouse, 1998). Reductions in physical activity during lactation may therefore serve to reduce this competitive heat load. Moreover, BAT contributes to basal heat production and hence

suppressing it may achieve similar reductions in heat production that would otherwise compete with the heat produced during milk synthesis, within the overall capacity to dissipate body heat. The fact that the currently available data do not unequivocally support one hypothesis over the other, combined with the fact that females may vary their intake in different situations, has reopened the question of whether intake is actually limited at all at peak lactation (Speakman and Król, 2011; Valencak et al., 2010). The suggestion has been made that the limits or constraints on intake may only reflect differential pup demand and the investment 'strategy' of the lactating female (Valencak et al., 2010; Zhao et al., 2013b; see also discussion in Speakman and Król, 2005).

In the current paper we aimed to monitor the  $T_b$  and physical activity levels of female mice prior to reproduction (baseline), during lactation and over a 10 day post-lactation period. Data for the period of pregnancy for the same individuals have already been published (Gamo et al., 2013). We simultaneously monitored food intake, body mass and pup growth. We predicted that if food intake at peak lactation is limited, rather than being dependent on pup demand, there would be a suppression in pup growth rates over the period of asymptotic food intake in late lactation, compared with earlier in lactation and during the subsequent period when the offspring start to feed themselves. If the HDL hypothesis is correct we expected that mice in lactation would be hyperthermic relative to their own body temperatures prior to and following breeding. We predicted the extent of this hyperthermia across individuals would be related directly to the level of energy intake, and would therefore increase throughout lactation as levels of energy intake increased. At peak lactation, hyperthermia would be expected to be related to the level of food intake and the litter mass being supported, because litter mass is closely related to milk production rates (Zhao, 2011). As observed in other studies, we expected that during physical activity the  $T_b$  would be elevated above that at rest. However, if the reduction in physical activity during lactation serves to reduce heat production, we predicted that there would be a reduction in the extent of elevation of  $T_b$  during physical activity relative to resting conditions when animals were lactating. Moreover, we anticipated that across individuals the reduction in physical activity would be related to the level of peak energy intake. In previous studies, observations were often terminated at peak lactation or when the offspring wean. In the current study we followed females for an additional 10 days to monitor how rapidly the female returns to the baseline state (if at all) when lactation is over.

## MATERIALS AND METHODS

### Animals and housing

We monitored  $T_b$  and physical activity of 26 female mice mated at age 12 weeks (*Mus musculus* Linnaeus 1758, outbred MF1 strain; supplied by Harlan UK, Bicester, UK). Monitoring was continuous, with records taken every minute, for 23 h per day, for the whole of lactation. For 18 of these individuals we also monitored them over a 10 day post-lactation period. Data were collected using passive implanted transmitters, VitalView telemetry and a data acquisition system (Mini Mitter, Bend, OR, USA). The total data set comprised ~1 million measurements each of physical activity and temperature. The raw data set will be made freely available to anyone wishing to use it on a collaborative basis. Please contact the corresponding author if you require access. Because of the restricted availability of monitoring equipment, the study was conducted over 3 years: 2005 ( $N=8$ ), 2006 ( $N=8$ ) and 2007 ( $N=10$ ). The same 26 animals were also monitored throughout pregnancy, in the context of energy compensation mechanisms during gestation, details of which are

presented in Gamo et al. (Gamo et al., 2013). Mice were kept at a temperature and humidity of  $21 \pm 1^\circ\text{C}$  and 50–60%, respectively, under a 12 h:12 h light:dark photoperiod. We monitored food intake, body mass, litter size and pup growth on a daily basis. Eight females matched for age were monitored as non-reproductive controls.

#### Experimental design in lactation and post-lactation

Daily food mass in the hopper as well as body mass were measured daily between 13:00 and 14:00 h in 2005, and between 09:00 and 10:00 h in 2006 and 2007 (for details, see Gamo et al., 2013). Food and energy intake were calculated using the same methods described previously (Król et al., 2007; Gamo et al., 2013). The day when pups were first observed was defined as the day of parturition, which was referred to as day of lactation 0 (DOL 0) following the convention established in Johnson et al. (Johnson et al., 2001a). No measurements of food and body mass were made on DOL 0 to avoid disturbance. Food mass measurement was restarted from the day after parturition (DOL 1); however, monitoring the mass of mothers was restarted from DOL 2. Between DOL 2 and DOL 20, litter size and litter mass were also recorded. The pups were removed on DOL 21. Subsequently, some of the mothers ( $N=18$  from year 2006 and 2007) remained in the same cages to be monitored over the following 10 days as a post-lactation period from lactation.  $T_b$  and activity were recorded using the same protocols as detailed in Gamo et al. (Gamo et al., 2013).

A transponder failed in one animal on DOL 15. The sample size for  $T_b$  and activity was therefore 26 until DOL 14, and 25 thereafter. In addition, the sample sizes for these parameters were reduced to 24 on DOL 19 and 22 on DOL 20, because of corrupted files after download. The sample size for  $T_b$  and activity was 17 mice during post-lactation. We have previously shown that  $T_b$  is elevated during the period during and immediately following physical activity (Gamo et al., 2013). We therefore defined the temperature for active animals 'active  $T_b$ ' as comprising the periods when physical activity was recorded by the transmitter plus the 15 min following cessation of activity. 'Inactive  $T_b$ ' was the  $T_b$  when the mice were inactive (as recorded by the transmitter) and not within 15 min of activity having occurred.

#### Data analysis

All data are expressed as means  $\pm$  s.d. ( $N$ =sample size). Energy intake and body mass of reproductive mice were compared with values in non-reproductive mice by repeated-measures ANOVA. Changes in energy intake and body mass of the mothers, and growth of offspring with days of lactation or post-lactation, were also assessed using repeated-measures ANOVA. Tukey *post hoc* tests were conducted to locate significant differences.

$T_b$  and activity counts were analysed using repeated-measures ANOVA, including time of a day and reproductive status (baseline, lactation and post-lactation) as factors. When significant differences were found, *post hoc* Tukey tests were conducted to locate significant differences. Furthermore, mean  $T_b$  and activity counts were grouped into sequential 5-day periods of lactation – DOL 1–5, DOL 6–10, DOL 11–15 and DOL 16–20 – and the effect of time of day and reproductive status were determined using ANOVA and Tukey *post hoc* tests. The relationships between energy intake, body mass, litter size, litter mass,  $T_b$  and activity counts were assessed by linear regression analysis. Further, mean  $T_b$  was analysed by generalised linear model (GLM) to establish the effects of activity counts, energy intake and maternal body mass on  $T_b$ . All statistical analyses were carried out using R (R Development Core Team, 2007).

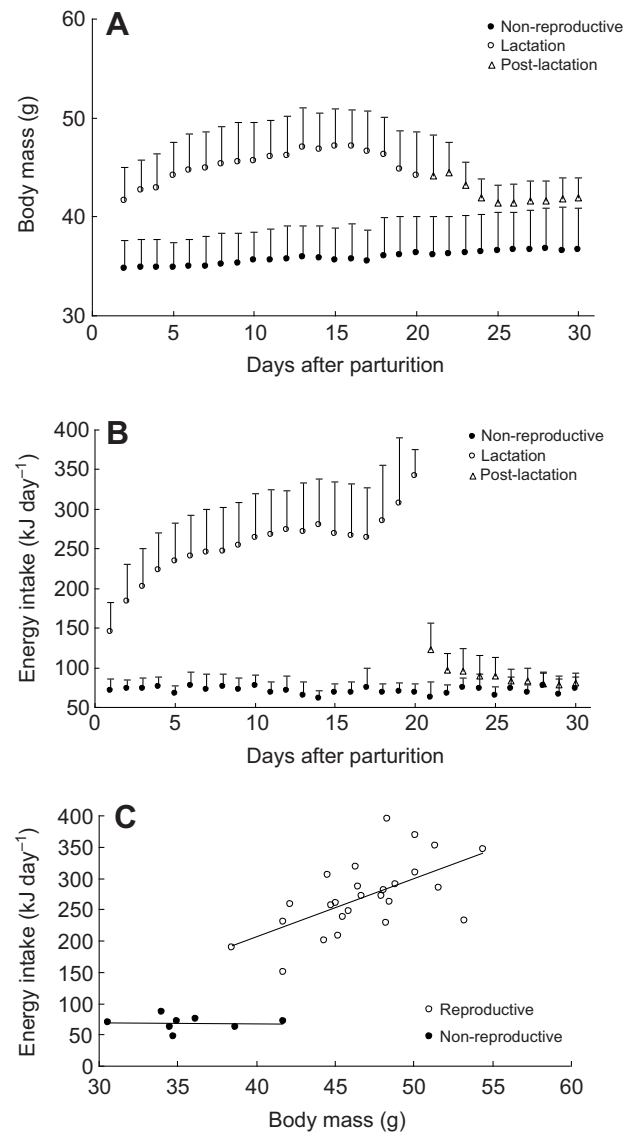

Fig. 1. (A) Body mass and (B) energy intake in reproductive and non-reproductive mice. All data are shown as means  $\pm$  s.d. Closed circles represent energy intake in non-reproductive mice ( $N=8$ ). Open circles and triangles indicate energy intake during lactation ( $N=26$ ) and post-lactation ( $N=18$ ), respectively. (C) The relationship between asymptotic energy intake and body mass. Plots represent mean intake between DOL 13 and 17 ( $N=26$ ) and for non-reproductive individuals across the same days ( $N=8$ ). Regressions are expressed by  $y=-0.09x+70.93$  ( $R^2=0.001$ ,  $P=0.953$ ) for non-reproductive mice and  $y=9.27x-164.60$  for reproductive mice ( $R^2=0.35$ ,  $P=0.001$ ).

## RESULTS

### Energy intake and body mass

Lactating mice weighed significantly more than non-reproductive mice (ANOVA, day:  $F_{18,604}=4.18$ ,  $P<0.001$ , reproductive status:  $F_{1,604}=846.56$ ,  $P<0.001$ , interaction of day and status:  $F_{18,604}=0.85$ ,  $P=0.65$ ; Fig. 1A). In lactation, body mass increased significantly from DOL 2 to DOL 13 (one-way ANOVA,  $F_{11,300}=4.91$ ,  $P<0.001$ ). During the post-lactation period, reproductive mice were significantly heavier than non-reproductive mice, but did not change their body mass significantly over time (ANOVA, day:  $F_{9,236}=1.80$ ,  $P=0.07$ , reproductive status:  $F_{1,236}=226.54$ ,  $P<0.001$ , interaction of status and day:  $F_{9,236}=1.06$ ,  $P=0.39$ ).

Energy intake during lactation and post-lactation was compared with that of non-reproductive mice (Fig. 1B). Lactating mice consumed significantly more food than non-reproductive mice and increasingly so as lactation progressed (ANOVA, day:  $F_{19,630}=13.48$ ,  $P<0.001$ , reproductive status:  $F_{1,630}=1589.01$ ,  $P<0.001$ , interaction of day and status:  $F_{19,630}=4.51$ ,  $P<0.001$ ). Mean energy intake of the non-reproductive mice was  $71.1 \text{ kJ day}^{-1}$  ( $N=8$ ) over the 19 days that coincided with lactation (DOL 1–20). Lactating mice progressively increased daily energy intake until DOL 12 (one-way ANOVA,  $F_{11,490}=14.93$ ,  $P<0.001$ ; Fig. 1A) and stabilised between DOL 13 and 17 at  $270.3 \text{ kJ day}^{-1}$ , the mean asymptotic daily energy intake. After DOL 17, offspring were able to eat food from the hoppers by themselves, which led to the increase in apparent energy consumption between DOL 18 and 20 (Fig. 1A). After weaning (DOL 21), energy intake of the mothers immediately dropped to an average of  $122.7 \text{ kJ day}^{-1}$ , which was still significantly higher than the energy intake of non-reproductive mice over the same time period (ANOVA, day:  $F_{9,231}=4.57$ ,  $P<0.001$ , reproductive status:  $F_{1,231}=56.63$ ,  $P<0.001$ , interaction of status and day:  $F_{9,231}=3.70$ ,  $P<0.001$ ). Energy intake returned to that observed in baseline on DOL 22. Fig. 1C shows the relationships between the asymptotic daily energy intake and mean body mass between DOL 13 and 17 for non-reproductive and reproductive mice. In non-reproductive mice, there was no significant relationship between daily energy intake and body mass ( $P=0.953$ ). In contrast, energy intake was significantly positively related to body mass in reproductive mice ( $y=9.268x-164.6$ ,  $R^2=0.35$ ,  $F_{1,24}=14.01$ ,  $P=0.001$ ). Heavier mothers consumed more energy at peak lactation than lighter ones.

#### Litter size and litter mass

Litter size varied from 3 to 15 pups across the individual mothers on DOL 2. Mean litter mass increased from  $21.03 \pm 5.33 \text{ g}$  on DOL 2 to  $97.39 \pm 22.27 \text{ g}$  on DOL 20 (Fig. 2A). Mean pup mass and daily body mass gain were calculated from the number of pups and total litter mass (Fig. 2B). Although the mean mass of the pups increased as lactation advanced (ANOVA,  $F_{18,471}=154.66$ ,  $P<0.001$ ), their daily mass gain was significantly reduced in late lactation; i.e. growth rate dropped from  $0.63 \pm 0.15 \text{ g day}^{-1}$  in early lactation (DOL 6) to  $0.29 \pm 0.12 \text{ g day}^{-1}$  in late lactation (DOL 15) (Tukey pairwise comparisons,  $P<0.01$ ). Growth rate increased again to match that in early lactation after DOL 17 when the young started eating solid food.

Maternal energy intake, maternal mass, litter size and litter mass were averaged for each mother during peak lactation, i.e. DOL 13–17. Individual means of energy intake were related with litter size and litter mass (Fig. 3). There was a positive non-linear relationship between maternal energy intake and litter size ( $y=75.26 \log x + 107.6$ ,  $R^2=0.18$ ,  $F_{1,24}=5.43$ ,  $P=0.029$ ; Fig. 3A). Removing the smallest litter (three pups), however, resulted in the relationship between the two variables becoming non-significant ( $P=0.313$ ). Maternal energy intake was highly correlated with litter mass both including ( $y=2.63x+73.00$ ,  $R^2=0.50$ ,  $F_{1,24}=23.73$ ,  $P<0.001$ ; Fig. 3B) or excluding the smallest litter ( $y=2.62x+73.82$ ,  $R^2=0.38$ ,  $F_{1,23}=14.25$ ,  $P<0.001$ ). Maternal body mass was significantly related to litter size ( $y=0.67x+40.88$ ,  $R^2=0.20$ ,  $F_{1,24}=6.10$ ,  $P=0.021$ ; Fig. 4A) and litter mass ( $y=0.12x+37.77$ ,  $R^2=0.28$ ,  $F_{1,24}=7.98$ ,  $P=0.009$ ; Fig. 4B). When the smallest litter was eliminated from the analysis, the significance in the relationship between maternal body mass and litter size became only marginal ( $P=0.068$ ). However, maternal body mass was still related to litter mass when the smallest litter was excluded ( $y=0.13x+37.43$ ,  $R^2=0.18$ ,  $F_{1,23}=5.17$ ,  $P=0.033$ ).

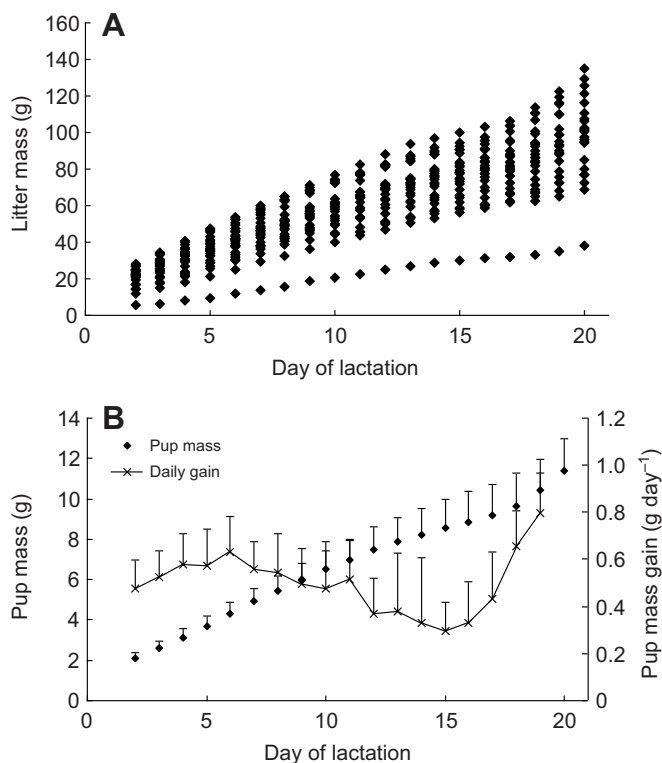

Fig. 2. (A) Mass growth of individual litters through lactation (DOL 2–20). (B) Mean pup mass and daily gain in mean pup mass. All data are shown as means + s.d. ( $N=26$ ). Closed diamonds express pup mass on average across 26 litters. Crosses plus line express daily gain of averaged pup mass across 26 litters.

#### Activity levels

Changes in mean daily activity levels during baseline, lactation and post-lactation are shown in Fig. 5. Mean activity varied significantly with day (repeated-measures ANOVA,  $F_{36,825}=14.01$ ,  $P<0.001$ ). Physical activity was significantly increased on all 7 days of baseline compared with lactating days (DOL 1–20, Tukey pairwise comparisons,  $P<0.05$ ). There was no difference in the level of daily activity throughout lactation (Tukey pairwise comparisons,  $P>0.05$ ). In addition, the daily activity level in the post-lactation period remained as low as that in lactation (Tukey pairwise comparisons,  $P>0.05$ ).

Circadian patterns in activity were calculated for each phase (baseline, lactation and post-lactation) by calculating the mean activity counts for each hour of the day (Fig. 6A). Physical activity varied significantly with time of day and among these periods (ANOVA, time,  $F_{22,1518}=46.65$ ,  $P<0.001$ , period,  $F_{2,1518}=125.24$ ,  $P<0.001$ , interaction of time and period,  $F_{44,1518}=10.51$ ,  $P<0.001$ ; Fig. 6A). A clear circadian pattern in activity was seen during baseline, with the highest levels of activity occurring during the night and the lowest during the day. At baseline, the highest and lowest hourly activity counts were  $58.47 \pm 31.43 \text{ counts h}^{-1}$  at 20:00 h and  $5.14 \pm 2.57 \text{ counts h}^{-1}$  at 15:00 h, respectively. During lactation, the lowest activity during the day was  $9.11 \pm 2.11 \text{ counts h}^{-1}$  at 12:00 h, which was significantly higher than the lowest value during baseline (Tukey pairwise comparisons,  $P<0.01$ ). In contrast, the highest activity in lactation,  $17.08 \pm 6.39 \text{ counts h}^{-1}$  at 20:00 h, was significantly lower than that of baseline (Tukey pairwise comparisons,  $P<0.01$ ). Mean hourly activity in lactation was significantly lower than baseline between 19:00 and 02:00 h at night,

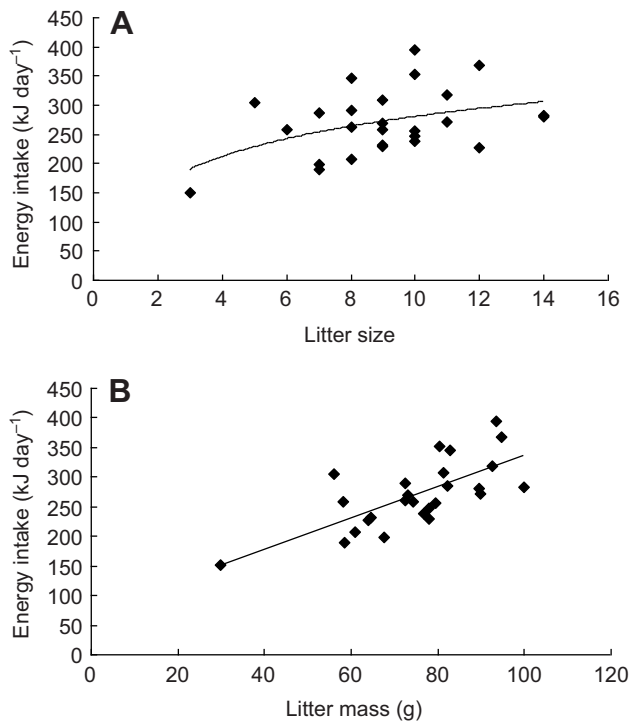

Fig. 3. Relationships between energy intake and litter size or litter mass during DOL 13–17. All data were averaged for individual litters across days between DOL 13 and 17 ( $N=26$ ). (A) The relationship between litter size and maternal energy intake. The regression is described by  $y=75.26\log x+107.6$  ( $R^2=0.184$ ,  $P=0.029$ ). (B) The relationship between litter mass and maternal energy intake. The regression is described by  $y=2.63x+73.004$  ( $R^2=0.497$ ,  $P<0.001$ ).

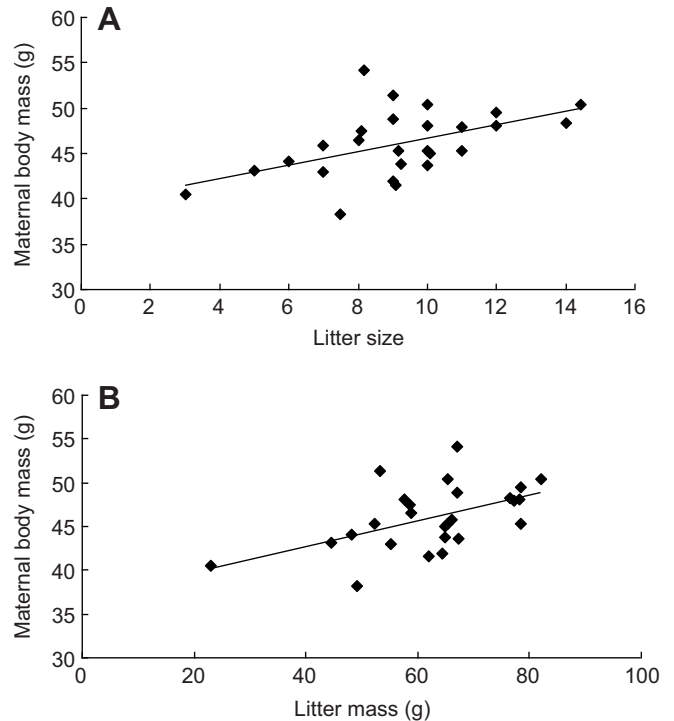

Fig. 4. Relationships between maternal body mass and litter size or litter mass during DOL 13–17. All data were averaged for individual litters across days between DOL 13 and 17 ( $N=26$ ). (A) The relationship between litter size and maternal body mass. The regression is described by  $y=0.666x+40.876$  ( $R^2=0.203$ ,  $P=0.021$ ). (B) The relationship between litter mass and maternal body mass. The regression is described by  $y=0.122x+37.765$  ( $R^2=0.18$ ,  $P=0.033$ ).

and did not differ significantly between lactation and baseline between 03:00 and 18:00h. During lactation, a circadian pattern in activity could still be observed as females were more active during the night between 19:00 and 22:00h than during the daytime at 11:00, 12:00 and 14:00h (Tukey pairwise comparisons,  $P<0.05$ ). Night-time activity during post-lactation was intermediate between baseline and lactation. The highest and lowest hourly values were  $34.7\pm 20.19$  at 20:00h and  $4.1\pm 1.28$  at 13:00h, respectively. Comparing baseline and post-lactation, only the highest values at 20:00h differed significantly (Tukey pairwise comparisons,  $P<0.01$ ). Compared with lactation, activity in post-lactation was significantly higher between 19:00 and 03:00h (Tukey pairwise comparisons,  $P<0.05$ ).

To explore the patterns of activity in lactation more closely, the lactation period was divided into four separate 5-day periods: DOL 1–5, DOL 6–1, DOL 11–15 and DOL 16–20. Circadian patterns in activity levels of these four periods were compared (Fig. 6B). Activity counts differed among time of day and period (ANOVA, time,  $F_{22,2277}=14.76$ ,  $P<0.001$ , period,  $F_{3,2277}=34.09$ ,  $P<0.001$ , interaction of time and period,  $F_{66,2277}=1.46$ ,  $P=0.01$ ). In early lactation (DOL 1–5) and late lactation (DOL 16–20), there was a clear circadian rhythm in activity levels; i.e. activity was significantly increased during the night (at 20:00h) compared with the lowest activity during daytime (Tukey pairwise comparisons,  $P<0.05$ ). During DOL 6–10 and DOL 11–15 there were no statistically significant changes of activity over time of day. In addition, the activity level at 20:00h was significantly higher in late lactation (DOL 16–20) compared with that in DOL 6–10 and DOL 11–15

(Tukey pairwise comparisons,  $P<0.05$ ), but similar to that in early lactation of DOL 1–5 (Tukey pairwise comparisons,  $P>0.05$ ).

### Body temperature

Daily means of active and inactive  $T_b$  are illustrated from baseline to post-lactation (Fig. 7A). Active  $T_b$  differed significantly with day (ANOVA,  $F_{36,825}=23.21$ ,  $P<0.001$ ). Mean active  $T_b$  was  $37.63\pm 0.23^\circ\text{C}$  during baseline and was significantly increased during lactation (DOL 2–19, Tukey pairwise comparisons,  $P<0.01$ ). From DOL 25 during post-lactation, mean  $T_b$  was significantly lower than that in lactation and not significantly different to the baseline values.

Inactive  $T_b$  also varied with day (ANOVA,  $F_{36,825}=73.83$ ,  $P<0.001$ ). During baseline, inactive  $T_b$  was lower than that in the whole of lactation (DOL 1–20, Tukey pairwise comparisons,  $P<0.01$ ). Compared with  $37.4\pm 0.27^\circ\text{C}$  on DOL 0, inactive  $T_b$  increased significantly from DOL 5 until DOL 17 (Tukey pairwise comparisons,  $P<0.01$ ). Inactive  $T_b$  declined after DOL 17 until it reached a level not statistically different to baseline on DOL 21. Differences between the active and inactive  $T_b$  are illustrated in Fig. 7B. Through all days in baseline, lactation DOL 0–10 and DOL 18–20 and all days of post-lactation, active  $T_b$  was significantly higher than inactive  $T_b$  (Tukey pairwise comparisons,  $P<0.05$ ). However, the difference between inactive and active  $T_b$  became substantially compressed during the latter stages of lactation (DOL 11–17), reflecting the large increase in the inactive  $T_b$ .

A significant circadian pattern in  $T_b$  was observed but this pattern differed between the different periods (two-way ANOVA,

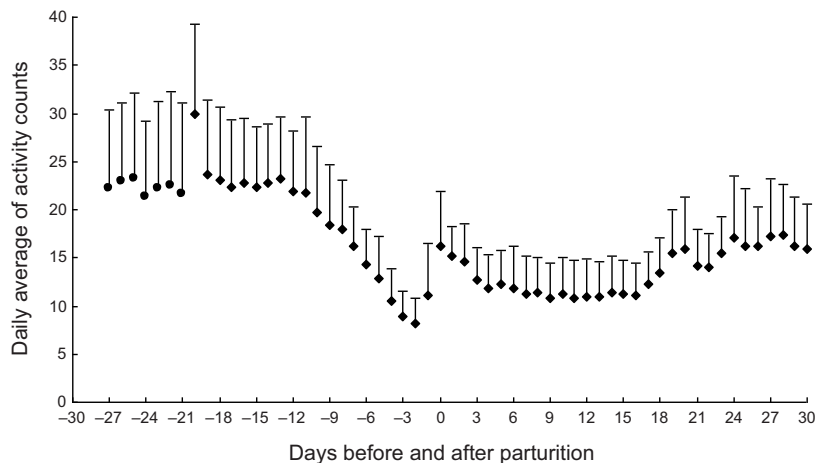

Fig. 5. Activity levels over baseline (days  $-27$  to  $-21$ ), pregnancy (days  $-15$  to  $-1$ ), lactation (days  $0$  to  $20$ ) and post-lactation (days  $21$  to  $30$ ). The data are expressed as means + s.d.

time,  $F_{22,1518}=92.84$ ,  $P<0.001$ , period,  $F_{2,1518}=979.36$ ,  $P<0.001$ , interaction of time and period,  $F_{44,1518}=6.17$ ,  $P<0.001$ ; Fig. 8A). No differences in  $T_b$  were found between baseline and post-lactation at any time of day. In contrast, mean  $T_b$  during lactation was higher during most of the day than at baseline (except from 20:00 to 23:00h) and post-lactation (except at 00:00 and 01:00h, Tukey pairwise comparisons,  $P<0.01$ ). Thus, it appeared that lactating females experienced elevated  $T_b$  throughout both the day and night. Mean  $T_b$  recovered immediately after weaning to the pattern at baseline (Fig. 8A). The highest and lowest mean  $T_b$  within lactation was  $38.35\pm 0.18^\circ\text{C}$  at 21:00h and  $37.61\pm 0.17^\circ\text{C}$  at 12:00h, respectively. As mean  $T_b$  was constantly high, the range of mean  $T_b$  was smaller during lactation than in either baseline or post lactation periods.

Mean  $T_b$  changes over the day were also compared among four different stages of lactation (Fig. 8B). Mean  $T_b$  varied significantly with time and with period (two-way ANOVA, time,  $F_{22,2277}=76.79$ ,  $P<0.001$ , period,  $F_{3,2277}=65.34$ ,  $P<0.001$ , interaction of time and period,  $F_{66,2277}=2.95$ ,  $P<0.001$ ). During the daytime, mean  $T_b$  over DOL 16–20 was lower than that in the earlier periods. Especially at 12:00 and 14:00h, the mean  $T_b$  during DOL 16–20 was significantly lower than that of DOL 6–10 and DOL 11–15 (Tukey pairwise comparisons,  $P<0.01$ ). There was no difference in mean  $T_b$  between DOL 6–10 and DOL 11–15. During the night-time, the earliest lactation period (DOL 1–5) had the lowest temperatures, and the mid-lactation (DOL 11–15) had the highest temperatures. Comparing these two periods, mean  $T_b$  differed significantly between 19:00 and 23:00h (Tukey pairwise comparisons,  $P<0.05$ ).

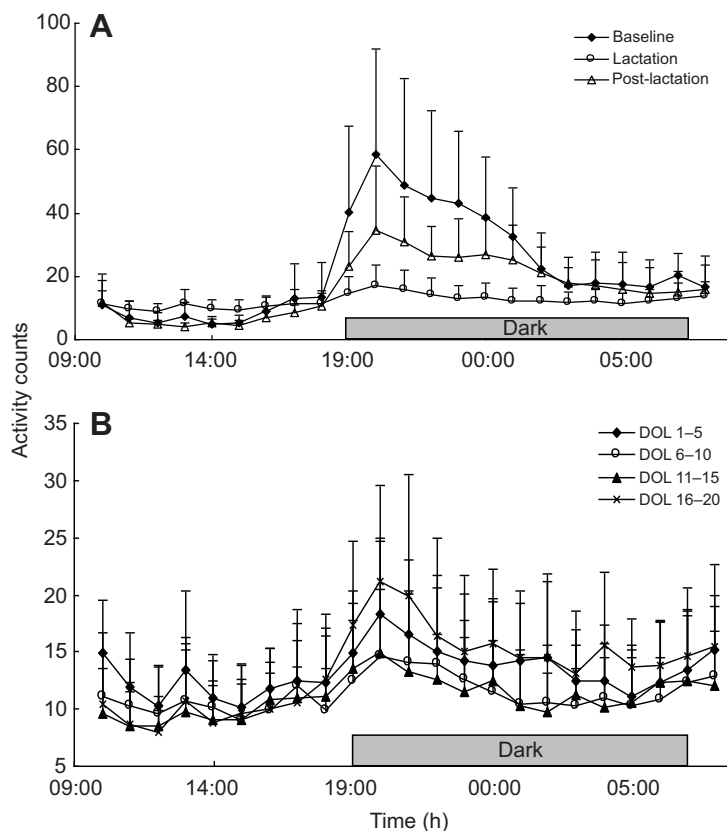

Fig. 6. (A) Activity levels through the day during baseline, lactation and post-lactation. Closed diamonds, open circles and open triangles show hourly mean activity counts in baseline, lactation and post-lactation, respectively. All data are expressed as means + s.d. ( $N=26$  for baseline and lactation, and  $N=17$  for post-lactation). Grey bar indicates the dark phase. (B) Activity changes throughout the day at different stages of lactation. Closed diamonds, open circles, closed triangles and crosses show hourly mean activity counts over DOL 1–5, 6–10, 11–15 and 16–20, respectively. All data are expressed as means + s.d. Sample sizes are 26 for DOL 1–5, 6–10 and 11–15, and 25 for DOL 16–20. Grey bar indicates the dark phase.

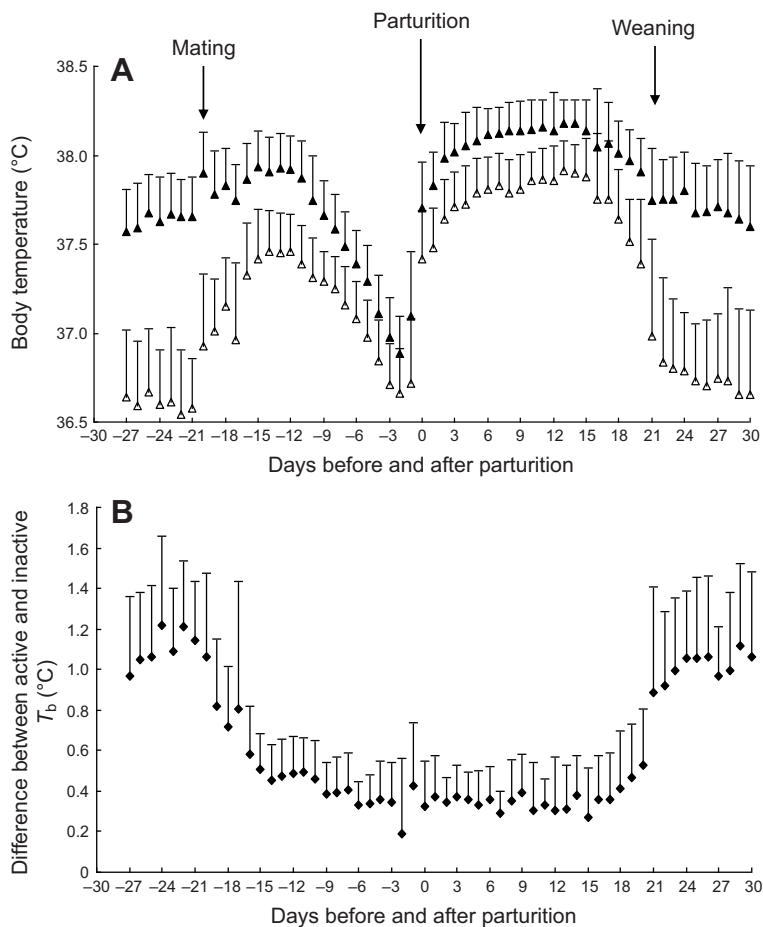

Fig. 7. (A) Daily changes of active and inactive body temperature ( $T_b$ ) in baseline, mating, pregnancy, lactation and post-lactation. Closed and open triangles represent active and inactive  $T_b$ , respectively. Baseline was days -27 to -21, mating days -20 to -16, pregnancy days -15 to -1, lactation days 0 to 20 and post-lactation days 21 to 30. (B) Difference between active and inactive  $T_b$  in relation to the day of reproduction. All data are expressed as means + s.d.

#### Relationships between activity, mean $T_b$ , energy intake and body mass

Relationships between physical activity and mean  $T_b$ , energy intake and body mass were analysed during lactation and the post-lactation period. The data for each parameter were averaged for each mouse for the 5 days approximating the peak lactation period (DOL 13–17;  $N=26$ ) and during post-lactation over the whole 10 days after weaning ( $N=17$ ). The relationship between physical activity and energy intake at peak lactation marginally failed to reach significance ( $P=0.051$ ; Fig. 9). When the female with the smallest litter was removed from the analysis, the relationship was significant ( $y=-6.52x+349.55$ ,  $R^2=0.25$ ,  $F_{1,23}=7.56$ ,  $P=0.011$ ). Mothers that had higher activity ingested less energy at peak lactation across the natural litter sizes of 5–14. The relationship between physical activity and energy intake was not significant during post-lactation ( $P=0.78$ ). Activity levels were also not related to maternal body mass at peak lactation ( $P=0.29$ ) or during the post-lactation period ( $P=0.33$ ). Energy intake was not significantly related to maternal  $T_b$  during peak lactation ( $P=0.54$ ) or during the post-lactation period ( $P=0.88$ ). The relationships between litter size or litter mass and maternal  $T_b$  were both not significant (litter size:  $P=0.25$ ; litter mass:  $P=0.20$ ).

#### DISCUSSION

##### Energy intake and body mass during lactation

Energy intake during lactation reached a plateau on day 13, consistent with previous data in the same strain of mouse lactating at the same ambient temperature (Johnson et al., 2001a; Vaanholt et al., 2013). However, the asymptotic net energy intake ( $270.3 \text{ kJ day}^{-1}$ ) in the present study was lower than that reported

previously in MF1 mice raising natural sized litters [ $310.2 \text{ kJ day}^{-1}$  (Johnson et al., 2001a)] and where litter size was experimentally increased [ $314.4 \text{ kJ day}^{-1}$  (Duah et al., 2013)]. Nevertheless, it was similar to the asymptotic net energy intake in the unmanipulated litters observed by Vaanholt et al. (Vaanholt et al., 2013) ( $265.8 \text{ kJ day}^{-1}$ ) and a group where litter sizes had been manipulated (both up and down), which averaged  $273.3 \text{ kJ day}^{-1}$  (Johnson et al., 2001b). The differences between the studies that contributed to the different asymptotic intakes are unclear. Although in the present experiment, the average litter size at weaning was slightly lower (mean=8.9) than in the previous experiments [ $11.2$  (Duah et al., 2013);  $12.0$  (Johnson et al., 2001a); and  $12.2$  (Vaanholt et al., 2013)], this is unlikely to have been important because above a litter size of around 6 there was no association between food (energy) intake and litter size in either the previous or present studies. As individual asymptotic intakes are highly variable and heritable (Vaanholt et al., 2013), it is possible that the differences between studies reflect random variations across samples, perhaps linked to genetic differences over time (the different studies were carried out over a period of 10 years).

Similar to energy intake, body mass gradually increased until DOL 13, which was consistent with previous reports in rats (*Rattus norvegicus*) (Strubbe and Gorissen, 1980), field voles (*Microtus agrestis*) (Simons et al., 2011) and mice (Duah et al., 2013; Johnson et al., 2001a; Johnson et al., 2001b; Vaanholt et al., 2013; Zhao et al., 2013b). Maternal body mass was correlated with the asymptotic energy intake, as previously reported in Brandt's voles (Wu et al., 2009) and mice (Johnson et al., 2001a; Johnson et al., 2001b; Vaanholt et al., 2013). Across the entire range of litter sizes, both

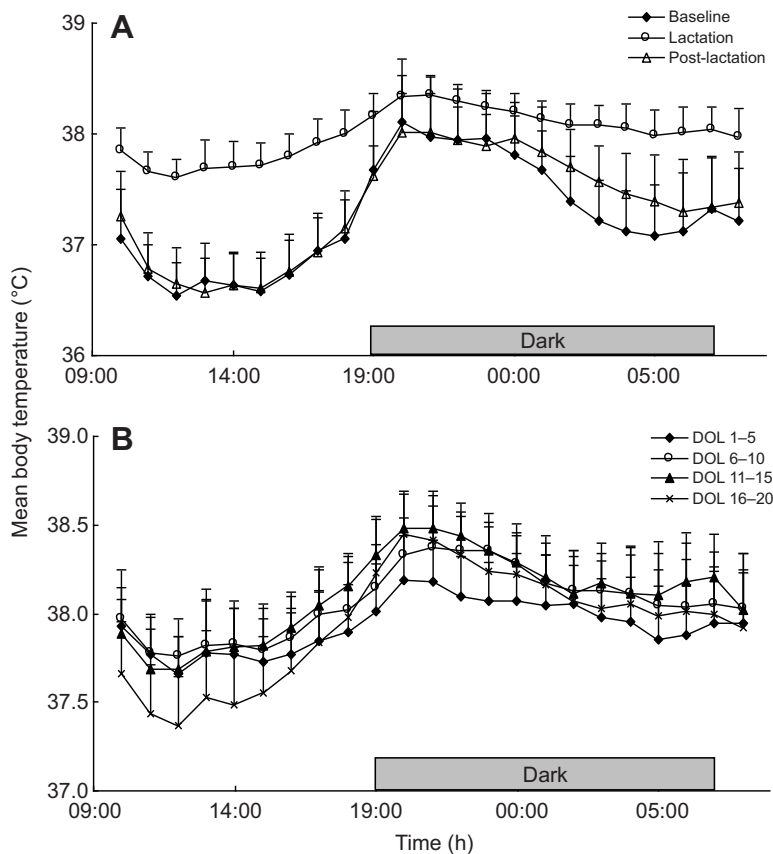

Fig. 8. (A) Mean  $T_b$  changes within a day of baseline, lactation and post-lactation. Closed diamonds, open circles and open triangles show hourly mean  $T_b$  in baseline, lactation and post-lactation, respectively. All data are expressed as means + s.d. ( $N=26$  for baseline and lactation, and 17 for post-lactation). Grey bar indicates the dark phase. (B) Mean  $T_b$  throughout the day at different stages of lactation. Closed diamonds, open circles, closed triangles and crosses show hourly mean activity counts over DOL 1–5, 6–10, 11–15 and 16–20, respectively. All data are expressed as means + s.d. Sample sizes are 26 for DOL 1–5, 6–10 and 11–15, and 25 for DOL 16–20. Grey bar indicates the dark phase.

litter size and litter mass were correlated with the asymptotic energy intake and maternal body mass during DOL 13–17. However, there was no correlation between asymptotic food intake and litter size over the range of litter sizes from 5 to 15, which was similar to the non-significant effects of litter size on asymptotic intake over natural litter size ranges from 7 to 13 pups (Johnson et al., 2001a; Johnson et al., 2001b) and 4 to 18 pups (Vaanholt et al., 2013). In contrast, total litter mass was more closely correlated with maternal energy intake and maternal body mass than litter size, as has also been reported previously (Duah et al., 2013; Johnson et al., 2001a; Johnson et al., 2001b; Vaanholt et al., 2013).

Together, the pooled data across these studies suggests that in these mice litter mass was a consequence of maternal investment, but that mothers were largely unresponsive to variations in litter size, leading to the negative relationship between individual pup mass and litter size. Consistent with this interpretation of a lack of sensitivity to litter size, asymptotic food intake did not increase in response to experimental increases in litter size in mice (Duah et al., 2013; Hammond and Diamond, 1992; Johnson et al., 2001a) or guinea pigs (*Cavia porcellus*) (Laurien-Kehnen and Trillmich, 2003). However, in other species of small mammal asymptotic intake at peak lactation was significantly related to differences in litter size [field vole for litters below  $N=6$  (Simons et al., 2011); brown hare (Valencak et al., 2010); Brandt's vole (Wu et al., 2009)]. The main difference between these two types of study, where lactation investment was, and was not, responsive to litter size, appears to be the sizes of the litters. Where litters are small (<6), the limits on maternal performance may be imposed by growth capacity of the offspring. In contrast, where litters are large, the limit may be more dependent on maternal energy intake and lactation capacity. Indeed, when litters were experimentally reduced in mice there was a significant relationship between litter size and intake (Johnson et

al., 2001a; Zhao et al., 2013b). The main exception to this rule appears to be the guinea pig, where investment was unrelated to litter size despite their small litters. This may be reflective of the precocial nature of guinea pig offspring and their high milk demands over a relatively short lactation. The differences resulting from litter size effects have probably contributed to differing interpretations in the past about the factors that limit lactation performance and asymptotic lactation food intake. A key question therefore is whether lactating mice are unusual because they have been selected to raise artificially large litter sizes. More studies of small mammals raising small litter sizes are required to answer this question.

In the present study, at the same time that maternal energy intake reached a plateau, the growth rate of offspring fell to almost half that observed in early lactation. This slow growth was unlikely to have been caused by the lowered ability of offspring to grow, as they returned to the same rate observed in early lactation a few days later when they obtained solid food by themselves at the end of lactation. This supports the interpretation that at peak lactation, at 21°C, when these mice are raising natural litter sizes, the lactating mother-offspring unit is limited by maternal energy intake, rather than by the growth potential of the offspring.

#### Physical activity and body temperature in lactating mice

Physical activity decreased significantly from parturition to DOL 18. This was similar to the decline in voluntary wheel-running activity shown in lactating hamsters (*Phodopus campbelli* and *P. sungorus*) (Scribner and Wynne-Edwards, 1994) and mice (Schubert et al., 2009; Zhao et al., 2013a), and to the reduced levels of general activity observed in lactating mice (Speakman et al., 2001). Reduced physical activity in lactation may have several benefits: it may release time for feeding or suckling (Speakman et al., 2001), it may save energy during lactation, which can then be allocated to reproduction (Schubert



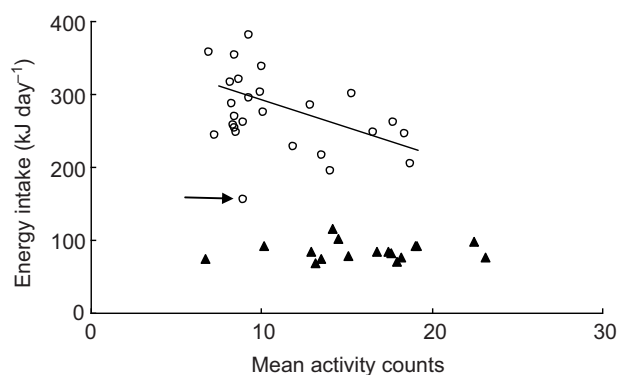

Fig. 9. Relationships between energy intake and activity level averaged for individual mice during peak lactation (DOL 13–17;  $N=26$  mice) and the whole post-lactation ( $N=17$  mice). Open circles and closed triangles represent lactation and post-lactation, respectively. The fitted line is the least squares regression for the lactation data ( $y=-6.515x+349.55$ ,  $R^2=0.247$ ,  $F_{1,23}=7.56$ ,  $P=0.011$ ) after removing the data for the smallest litter (arrow).

et al., 2009), and it may reduce competitive heat production (Zhao et al., 2013a). Consistent with the latter effect, we found that physical activity was negatively associated with energy intake levels at peak lactation. This suggests that those mice with greater energy intake reduced their physical activity the most to facilitate the greater intake. Previous observations suggested the major reduction in locomotor (wheel running) activity in lactation occurred at night, in both mice and hamsters (Schubert et al., 2009; Scribner and Wynne-Edwards, 1994; Zhao et al., 2013a), and we observed a similar effect with respect to voluntary physical activity. In contrast to what happened at night, voluntary activity in the light phase increased during lactation compared with that during baseline. Previous studies have also shown that the frequencies of feeding and drinking behaviours progressively increased during the day in lactating mice (Speakman et al., 2001), rats (Kittrell and Satinoff, 1988; Strubbe and Gorissen, 1980) and dwarf hamsters (Scribner and Wynne-Edwards, 1994). This suggests that non-reproductive animals can rest during the daytime, but lactating mothers may need to be more active during daytime because of their elevated food and water requirements that cannot be satisfied by feeding at night alone. There may also be a disruption of sleep, because of disturbance by their offspring (Young et al., 1998; Waterhouse et al., 2001).

Lactating mice were chronically hyperthermic. This observation accords with more sporadic measurements of  $T_b$  made in other lactating small rodents such as Mongolian gerbils (*Meriones unguiculatus*) (Weinandy and Gattermann, 1995), dwarf hamsters (*Phodopus campbelli* and *P. sungorus*) (Scribner and Wynne-Edwards, 1994) and Sprague-Dawley rats (*Rattus norvegicus*) (Fewell, 1995). The period when  $T_b$  was highest was between DOL 13 and 17, which was equivalent to the time when asymptotic daily energy intake occurred. The fact that chronic hyperthermia matched to the period of maximal sustained energy intake is consistent with the HDL hypothesis that peak energy intake may be constrained by the ability of mothers to dissipate heat at peak lactation (Król and Speakman, 2003a; Król and Speakman, 2003b; Król et al., 2003; Król et al., 2007; Speakman and Król, 2010).

Potential drivers of the elevated  $T_b$  during lactation include the heat associated with digestion of the elevated levels of food intake, and the heat generated as a byproduct of milk synthesis and the resting metabolic rate. Previous estimates of resting metabolic rate

in lactation in this strain indicate that it is dependent on body mass and averages  $40 \text{ kJ day}^{-1}$  (Johnson et al., 2001b). Hence resting metabolic rate was on average 14.8% of the gross energy intake, and 33% of the total heat burden (net energy intake minus energy exported as milk). Both food intake and milk production increased between parturition and peak lactation, and  $T_b$  increased in parallel with these changes as would be predicted. However, we did not find any significant association between  $T_b$  and food intake at peak lactation across the individuals. This could be because heat generated from milk synthesis is far more significant. Milk energy output is equivalent to 44% of gross energy intake at  $21^\circ\text{C}$  (Johnson et al., 2001a) and milk production is only approximately 60% efficient, leading to a large heat burden when compared with the 3–6% of gross energy intake that appears as the heat increment of feeding (Secor, 2009). Yet we also did not find any significant association across the individual mice between maternal  $T_b$  at peak lactation and litter mass, which we have previously shown to be strongly correlated with milk production (Johnson et al., 2001a; Król and Speakman, 2003b; Vaanholt et al., 2013). These negative relationships do not, however, mean that food intake and milk production at peak lactation do not contribute to elevated heat production, because the mice may have modulated their intake and milk production in relation to their individual capacities to dissipate body heat to keep  $T_b$  constant.

Alternatively, or additionally, the elevation in  $T_b$  might be associated indirectly with the hormonal secretions that induce and maintain milk production such as prolactin (Svennersten-Sjaunja and Olsson, 2005) and other hormonal changes that are linked to lactation such as the reduced levels of circulating leptin (Cui et al., 2011; Król et al., 2011). In fact, prolactin appears to be strongly positively correlated with  $T_b$  during exertional heat stress (Pitsiladis et al., 2002; Wright et al., 2012), although in this case it appears the causal relationship is that elevated temperature stimulates prolactin release (Low et al., 2005) and not the reverse. In non-reproductive gerbils, peripheral administration of prolactin significantly reduced  $T_b$  (Yang et al., 2013), perhaps mediated via a reduction in the activity of BAT (Król et al., 2011). Prolactin-releasing peptide administered by intracerebroventricular (ICV) injection resulted in increased core  $T_b$  (Ellacott et al., 2002), but the relationship of this peptide to prolactin release, despite its name, is uncertain. Hence, the relationship of prolactin to  $T_b$  remains unclear. Leptin, in contrast, consistently increases  $T_b$  when administered either by ICV injection or peripherally (Luheshi et al., 1999). Leptin was originally discovered as the mutated gene in a mutant mouse called the ob/ob mouse, which is characterised by having extreme hyperphagia and profound obesity (Zhang et al., 1994). Ob/ob mice are unable to produce functional leptin because of a mutation that leads to a premature stop codon and hence a truncated protein. Ob/ob mice that lack functional leptin have lowered  $T_b$ , which can be reversed by leptin administration (Harris et al., 1998). Hence lowered leptin levels, in lactation, seem an unlikely candidate to stimulate  $T_b$ . However,  $T_b$  was significantly suppressed by the removal of the adrenal glands and the ovaries from female rats (Leon et al., 1978; Leon et al., 1985; Marrone et al., 1976), pointing to additional hormonal drivers that could be involved.

Finally, mothers might have dissipated heat inefficiently, as a large portion of the surface area of the maternal body was surrounded by growing pups during suckling bouts. This may have elevated heat retention, and therefore  $T_b$ , as female rats (*Rattus norvegicus*) terminate contact with their pups, and leave their nest to avoid a risk of developing hyperthermia, at a high ambient temperature (Adels and Leon, 1986; Croskerry et al., 1978). Both mice and gerbils

significantly thin their pelage during lactation (Zhao et al., 2013a; Yang et al., 2013) and this may offset some of the problem of being unable to dissipate heat because the suckling pups clustered around the female.

### Post-lactation

Consistent with the previous reports in rats (Strubbe and Gorissen, 1980) and hamsters (*Mesocricetus auratus*) (Fleming, 1978), the decline in maternal energy intake was immediate after lactation ended, and was reduced to levels not significantly different from those at baseline pre-reproduction. Nevertheless, in MF1 mice (present study) and rats (Strubbe and Gorissen, 1980), post-lactation body mass remained much heavier than that at baseline pre-reproduction. This disconnect between energy intake and body mass between pre- and post-lactation periods might be explained by the reduction in physical activity at night during the post-lactation period, suggesting that mice recovering from lactation decreased their energy demands by lowering energy expenditure for physical activity rather than by losing body mass.

In summary, we used implanted transponders to monitor the  $T_b$  of mice at 1 min intervals throughout lactation, and compared these values with those from the same individuals during both pre-reproduction and post-lactation periods to test predictions of the HDL theory. The main finding was that mice during lactation were chronically hyperthermic relative to their own  $T_b$  measured pre- and post-reproduction. This hyperthermia persisted through both day and night, but was most marked relative to during the daytime, when  $T_b$  of lactating mice was on average 1.1°C hotter than during the baseline pre-reproduction period and post-lactation period. The extent of hyperthermia was greatest during the period of peak lactation. These observed patterns were consistent with the expectations from the HDL theory. The lactation hyperthermia developed despite activity levels in lactation being reduced to approximately half the baseline levels. Moreover, the reduction in activity was negatively associated with peak lactation energy intake – suggesting that the reduction in activity primarily served to reduce competitive heat production, and was therefore downregulated the most in those mice with the greatest increase in energy intake. The mechanisms contributing to the lactational hyperthermia remain unclear, but it was unrelated to variations in either food intake or litter size/mass at peak lactation. Finally, offspring growth was suppressed during the period of peak lactation, relative to the immediately preceding and following periods, suggesting that maternal performance at peak lactation was the primary limit on the mother–offspring system, not offspring growth capacity.

### ACKNOWLEDGEMENTS

We are grateful to Paula Redman and the staff of the animal house for assistance with the equipment and for looking after the animals. Amelie Barnard, Fraser Munro, Katie Derrer, Nicholas Jeannesson, Hannah Gray, Jennifer Miller, Amy Campbell and Jennifer Dixon assisted with data collection and measurements of food intake and body weight. We are grateful to Andrew Adams and Kerry Cameron for their assistance with surgery on the animals.

### AUTHOR CONTRIBUTIONS

J.R.S. and Y.G. designed the study. Y.G., C.T., S.E.M. and C.H. collected the data. Y.G., L.M.V. and J.R.S. analysed the data. J.R.S. and Y.G. wrote the paper, and C.H., S.E.M. and L.M.V. contributed to improving it for publication.

### COMPETING INTERESTS

No competing interests declared.

### FUNDING

Y.G. was supported by a grant from the International Rotary Foundation, and L.M.V. was supported by a Rubicon fellowship from the Netherlands Scientific

Organisation (NWO). The work was funded in part by a grant from the Natural Environmental Research Council [grant no. NE/C004159/1] to J.R.S. and C.H.

### REFERENCES

- Adels, L. E. and Leon, M. (1986). Thermal control of mother-young contact in Norway rats: factors mediating the chronic elevation of maternal temperature. *Physiol. Behav.* **36**, 183-196.
- Butte, N. F. and King, J. C. (2005). Energy requirements during pregnancy and lactation. *Public Health Nutr.* **8** 7A, 1010-1027.
- Croskerry, P. G., Smith, G. K. and Leon, M. (1978). Thermoregulation and the maternal behaviour of the rat. *Nature* **273**, 299-300.
- Cui, J. G., Tang, G. B., Wang, D. H. and Speakman, J. R. (2011). Effects of leptin infusion during peak lactation on food intake, body composition, litter growth, and maternal neuroendocrine status in female Brandt's voles (*Lasiopodomys brandtii*). *Am. J. Physiol.* **300**, R447-R459.
- Duah, O. A., Monney, K. A., Hambly, C., Król, E. and Speakman, J. R. (2013). Limits to sustained energy intake. XVII. Lactation performance in MF1 mice is not programmed by fetal number during pregnancy. *J. Exp. Biol.* **216**, 2339-2348.
- Eliason, H. L. and Fewell, J. E. (1997). Thermoregulatory control during pregnancy and lactation in rats. *J. Appl. Physiol.* **83**, 837-844.
- Ellacott, K. L., Lawrence, C. B., Rothwell, N. J. and Luckman, S. M. (2002). PRL-releasing peptide interacts with leptin to reduce food intake and body weight. *Endocrinology* **143**, 368-374.
- Fewell, J. E. (1995). Body temperature regulation in rats near term of pregnancy. *Can. J. Physiol. Pharmacol.* **73**, 364-368.
- Fleming, A. S. (1978). Food intake and body weight regulation during the reproductive cycle of the golden hamster (*Mesocricetus auratus*). *Behav. Biol.* **24**, 291-306.
- Gamo, Y., Bernard, A., Mitchell, S. E., Hambly, C., Al Jothery, A., Vaanholt, L. M., Król, E. and Speakman, J. R. (2013). Limits to sustained energy intake. XVI. Body temperature and physical activity of female mice during pregnancy. *J. Exp. Biol.* **216**, 2328-2338.
- Hammond, K. A. and Diamond, J. M. (1992). An experimental test for a ceiling on sustained metabolic rate in lactating mice. *Physiol. Zool.* **65**, 952-977.
- Hammond, K. A. and Kristan, D. M. (2000). Responses to lactation and cold exposure by deer mice (*Peromyscus maniculatus*). *Physiol. Biochem. Zool.* **73**, 547-556.
- Hammond, K. A., Konarzowski, M., Torres, R. M. and Diamond, J. (1994). Metabolic ceilings under a combination of peak energy demands. *Physiol. Zool.* **67**, 1479-1506.
- Hammond, K. A., Lloyd, K. C. and Diamond, J. (1996). Is mammary output capacity limiting to lactational performance in mice? *J. Exp. Biol.* **199**, 337-349.
- Harris, R. B., Zhou, J., Redmann, S. M., Jr, Smagin, G. N., Smith, S. R., Rodgers, E. and Zachwieja, J. J. (1998). A leptin dose-response study in obese (ob/ob) and lean (+/?) mice. *Endocrinology* **139**, 8-19.
- Jansen, G. R. and Binard, R. (1991). Effect of dietary protein and environmental factors on lactation performance in rats. *Physiol. Behav.* **50**, 297-304.
- Johnson, M. S. and Speakman, J. R. (2001). Limits to sustained energy intake. V. Effect of cold-exposure during lactation in *Mus musculus*. *J. Exp. Biol.* **204**, 1967-1977.
- Johnson, M. S., Thomson, S. C. and Speakman, J. R. (2001a). Limits to sustained energy intake. I. Lactation in the laboratory mouse *Mus musculus*. *J. Exp. Biol.* **204**, 1925-1935.
- Johnson, M. S., Thomson, S. C. and Speakman, J. R. (2001b). Limits to sustained energy intake. II. Inter-relationships between resting metabolic rate, life-history traits and morphology in *Mus musculus*. *J. Exp. Biol.* **204**, 1937-1946.
- Kittrell, E. M. W. and Satinoff, E. (1988). Diurnal rhythms of body temperature, drinking and activity over reproductive cycles. *Physiol. Behav.* **42**, 477-484.
- Kristan, D. M. and Hammond, K. A. (2000). Combined effects of cold exposure and sublethal intestinal parasites on host morphology and physiology. *J. Exp. Biol.* **203**, 3495-3504.
- Król, E. and Speakman, J. R. (2003a). Limits to sustained energy intake. VI. Energetics of lactation in laboratory mice at thermoneutrality. *J. Exp. Biol.* **206**, 4255-4266.
- Król, E. and Speakman, J. R. (2003b). Limits to sustained energy intake. VII. Milk energy output in laboratory mice at thermoneutrality. *J. Exp. Biol.* **206**, 4267-4281.
- Król, E., Johnson, M. S. and Speakman, J. R. (2003). Limits to sustained energy intake. VIII. Resting metabolic rate and organ morphology of laboratory mice lactating at thermoneutrality. *J. Exp. Biol.* **206**, 4283-4291.
- Król, E., Murphy, M. and Speakman, J. R. (2007). Limits to sustained energy intake. X. Effects of fur removal on reproductive performance in laboratory mice. *J. Exp. Biol.* **210**, 4233-4243.
- Król, E., Martin, S. A., Huhtaniemi, I. T., Douglas, A. and Speakman, J. R. (2011). Negative correlation between milk production and brown adipose tissue gene expression in lactating mice. *J. Exp. Biol.* **214**, 4160-4170.
- Laurien-Kehnen, C. and Trillmich, F. (2003). Lactation performance of guinea pigs (*Cavia porcellus*) does not respond to experimental manipulation of pup demands. *Behav. Ecol. Sociobiol.* **53**, 145-152.
- Leon, M. and Woodside, B. (1983). Energetic limits on reproduction: maternal food intake. *Physiol. Behav.* **30**, 945-957.
- Leon, M., Croskerry, P. G. and Smith, G. K. (1978). Thermal control of mother-young contact in rats. *Physiol. Behav.* **21**, 793-811.
- Leon, M., Adels, L. and Coopersmith, R. (1985). Thermal limitation of mother-young contact in Norway rats. *Dev. Psychobiol.* **18**, 85-105.
- Low, D., Purvis, A., Reilly, T. and Cable, N. T. (2005). The prolactin responses to active and passive heating in man. *Exp. Physiol.* **90**, 909-917.
- Lufeshi, G. N., Gardner, J. D., Rushforth, D. A., Loudon, A. S. and Rothwell, N. J. (1999). Leptin actions on food intake and body temperature are mediated by IL-1. *Proc. Natl. Acad. Sci. USA* **96**, 7047-7052.

- Marrone, B. L., Gentry, R. T. and Wade, G. N. (1976). Gonadal hormones and body temperature in rats: effects of estrous cycles, castration and steroid replacement. *Physiol. Behav.* **17**, 419-425.
- Morag, M., Kali, J. and Furman, M. (1969). The effect of a desert climate on the lactation and on the fertility of the nursing rat. *Int. J. Biometeorol.* **13**, 61-68.
- Paul, M. J., Tuthill, C., Kauffman, A. S. and Zucker, I. (2010). Pelage insulation, litter size, and ambient temperature impact maternal energy intake and offspring development during lactation. *Physiol. Behav.* **100**, 128-134.
- Perrigo, G. (1987). Breeding and feeding strategies in deer mice and house mice when females are challenged to work for their food. *Anim. Behav.* **35**, 1298-1316.
- Piersma, T. and van Gils, J. A. (2010). *The Flexible Phenotype: a Body-centred Integration of Ecology, Physiology, and Behaviour*. Oxford: Oxford University Press.
- Pitsiladis, Y. P., Strachan, A. T., Davidson, I. and Maughan, R. J. (2002). Hyperprolactinaemia during prolonged exercise in the heat: evidence for a centrally mediated component of fatigue in trained cyclists. *Exp. Physiol.* **87**, 215-226.
- R Development Core Team (2007). R: A Language and Environment for Statistical Computing. Vienna, Austria: R Foundation for Statistical Computing.
- Refinetti, R. (2003). Metabolic heat production, heat loss and the circadian rhythm of body temperature in the rat. *Exp. Physiol.* **88**, 423-429.
- Rogowitz, G. L. (1998). Limits to milk flow and energy allocation during lactation of the hispid cotton rat (*Sigmodon hispidus*). *Physiol. Zool.* **71**, 312-320.
- Schubert, K. A., de Vries, G., Vaanholt, L. M., Meijer, H. A. J., Daan, S. and Verhulst, S. (2009). Maternal energy allocation to offspring increases with environmental quality in house mice. *Am. Nat.* **173**, 831-840.
- Scribner, S. J. and Wynne-Edwards, K. E. (1994). Disruption of body temperature and behavior rhythms during reproduction in dwarf hamsters (*Phodopus*). *Physiol. Behav.* **55**, 361-369.
- Secor, S. M. (2009). Specific dynamic action: a review of the postprandial metabolic response. *J. Comp. Physiol. B* **179**, 1-56.
- Simons, M. J., Reimert, I., van der Vinne, V., Hambly, C., Vaanholt, L. M., Speakman, J. R. and Gerkema, M. P. (2011). Ambient temperature shapes reproductive output during pregnancy and lactation in the common vole (*Microtus arvalis*): a test of the heat dissipation limit theory. *J. Exp. Biol.* **214**, 38-49.
- Speakman, J. R. (2008). The physiological costs of reproduction in small mammals. *Philos. Trans. R. Soc. B* **363**, 375-398.
- Speakman, J. R. and Król, E. (2005). Limits to sustained energy intake IX: a review of hypotheses. *J. Comp. Physiol. B* **175**, 375-394.
- Speakman, J. R. and Król, E. (2010). Maximal heat dissipation capacity and hyperthermia risk: neglected key factors in the ecology of endotherms. *J. Anim. Ecol.* **79**, 726-746.
- Speakman, J. R. and Król, E. (2011). Limits to sustained energy intake. XIII. Recent progress and future perspectives. *J. Exp. Biol.* **214**, 230-241.
- Speakman, J. R. and McQueenie, J. (1996). Limits to sustained metabolic rate: the link between food intake, basal metabolic rate, and morphology in reproducing mice, *Mus musculus*. *Physiol. Zool.* **69**, 746-769.
- Speakman, J. R., Gidney, A., Bett, J., Mitchell, I. P. and Johnson, M. S. (2001). Limits to sustained energy intake. IV. Effect of variation in food quality on lactating mice *Mus musculus*. *J. Exp. Biol.* **204**, 1957-1965.
- Strubbe, J. H. and Gorissen, J. (1980). Meal patterning in the lactating rat. *Physiol. Behav.* **25**, 775-777.
- Studier, E. H. (1979). Bioenergetics of growth, pregnancy and lactation in the laboratory mouse, *Mus musculus*. *Comp. Biochem. Physiol.* **64**, 473-481.
- Svennersten-Sjaunja, K. and Olsson, K. (2005). Endocrinology of milk production. *Domest. Anim. Endocrinol.* **29**, 241-258.
- Trayhurn, P. (1983). Decreased capacity for non-shivering thermogenesis during lactation in mice. *Pflügers Arch.* **398**, 264-265.
- Trayhurn, P. and Jennings, G. (1987). Functional atrophy of brown adipose tissue during lactation in mice. Effects of lactation and weaning on mitochondrial GDP binding and uncoupling protein. *Biochem. J.* **248**, 273-276.
- Vaanholt, L. M., Sinclair, R. E. and Speakman, J. R. (2013). Limits to sustained energy intake. XIV. Heritability of reproductive performance in mice. *J. Exp. Biol.* **216**, 2308-2315.
- Valencak, T. G., Hackländer, K. and Ruf, T. (2010). Peak energy turnover in lactating European hares: a test of the heat dissipation limitation hypothesis. *J. Exp. Biol.* **213**, 2832-2839.
- Wade, G. N. and Schneider, J. E. (1992). Metabolic fuels and reproduction in female mammals. *Neurosci. Biobehav. Rev.* **16**, 235-272.
- Waterhouse, J., Folkard, S., Van Dongen, H., Minors, D., Owens, D., Kerkhof, G., Weinert, D., Nevill, A., Macdonald, I., Sytnik, N. et al. (2001). Temperature profiles, and the effect of sleep on them, in relation to morningness-eveningness in healthy female subjects. *Chronobiol. Int.* **18**, 227-247.
- Weinandy, R. and Gattermann, R. (1995). Measurement of physiological parameters and activity in a Mongolian gerbil during gravidity and lactation with an implanted transmitter. *Physiol. Behav.* **58**, 811-814.
- Weinert, D. and Waterhouse, J. (1998). Diurnally changing effects of locomotor activity on body temperature in laboratory mice. *Physiol. Behav.* **63**, 837-843.
- Wright, H. E., McLellan, T. M., Friesen, B. J., Casa, D. J. and Kenny, G. P. (2012). Influence of circulating cytokines on prolactin during slow vs. fast exertional heat stress followed by active or passive recovery. *J. Appl. Physiol.* **113**, 574-583.
- Wu, S. H., Zhang, L. N., Speakman, J. R. and Wang, D. H. (2009). Limits to sustained energy intake. XI. A test of the heat dissipation limitation hypothesis in lactating Brandt's voles (*Lasiopodomys brandtii*). *J. Exp. Biol.* **212**, 3455-3465.
- Yang, D. B., Li, L., Wang, L. P., Chi, Q. S., Hambly, C., Wang, D. H. and Speakman, J. R. (2013). Limits to sustained energy intake XIX: A test of the heat dissipation limitation hypothesis in Mongolian gerbils (*Meriones unguiculatus*). *J. Exp. Biol.*
- Young, A. J., Castellani, J. W., O'Brien, C., Shippee, R. L., Tikuisis, P., Meyer, L. G., Blanchard, L. A., Kain, J. E., Cadarette, B. S. and Sawka, M. N. (1998). Exertional fatigue, sleep loss, and negative energy balance increase susceptibility to hypothermia. *J. Appl. Physiol.* **85**, 1210-1217.
- Zhang, X. Y. and Wang, D. H. (2007). Thermogenesis, food intake and serum leptin in cold-exposed lactating Brandt's voles *Lasiopodomys brandtii*. *J. Exp. Biol.* **210**, 512-521.
- Zhang, Y., Proenca, R., Maffei, M., Barone, M., Leopold, L. and Friedman, J. M. (1994). Positional cloning of the mouse obese gene and its human homologue. *Nature* **372**, 425-432.
- Zhao, Z. J. (2011). Milk energy output in Swiss mice throughout the first, second, third and fourth lactation events. *J. Exp. Biol.* **214**, 2919-2926.
- Zhao, Z. J. and Cao, J. (2009). Effect of fur removal on the thermal conductance and energy budget in lactating Swiss mice. *J. Exp. Biol.* **212**, 2541-2549.
- Zhao, Z. J., Chi, Q. S. and Cao, J. (2010). Milk energy output during peak lactation in shaved Swiss mice. *Physiol. Behav.* **101**, 59-66.
- Zhao, Z. J., Król, E., Moille, S., Gamo, Y. and Speakman, J. R. (2013a). Limits to sustained energy intake. XV. Effects of wheel running on the energy budget during lactation. *J. Exp. Biol.* **216**, 2316-2327.
- Zhao, Z. J., Song, D. G., Su, Z. C., Wei, W. B., Liu, X. B. and Speakman, J. R. (2013b). Limits to sustained energy intake. XVIII. Energy intake and reproductive output during lactation in Swiss mice raising small litters. *J. Exp. Biol.* **216**, 2349-2358.
